# Supplementary figures and images for: Surface Phenotype Changes and Increased Response to Oxidative Stress in CD4+CD25high T Cells
Source: MDPI journal article supplement (doi:10.3390/biomedicines9060616), 2021-05-29

Figure S1. Microarray data

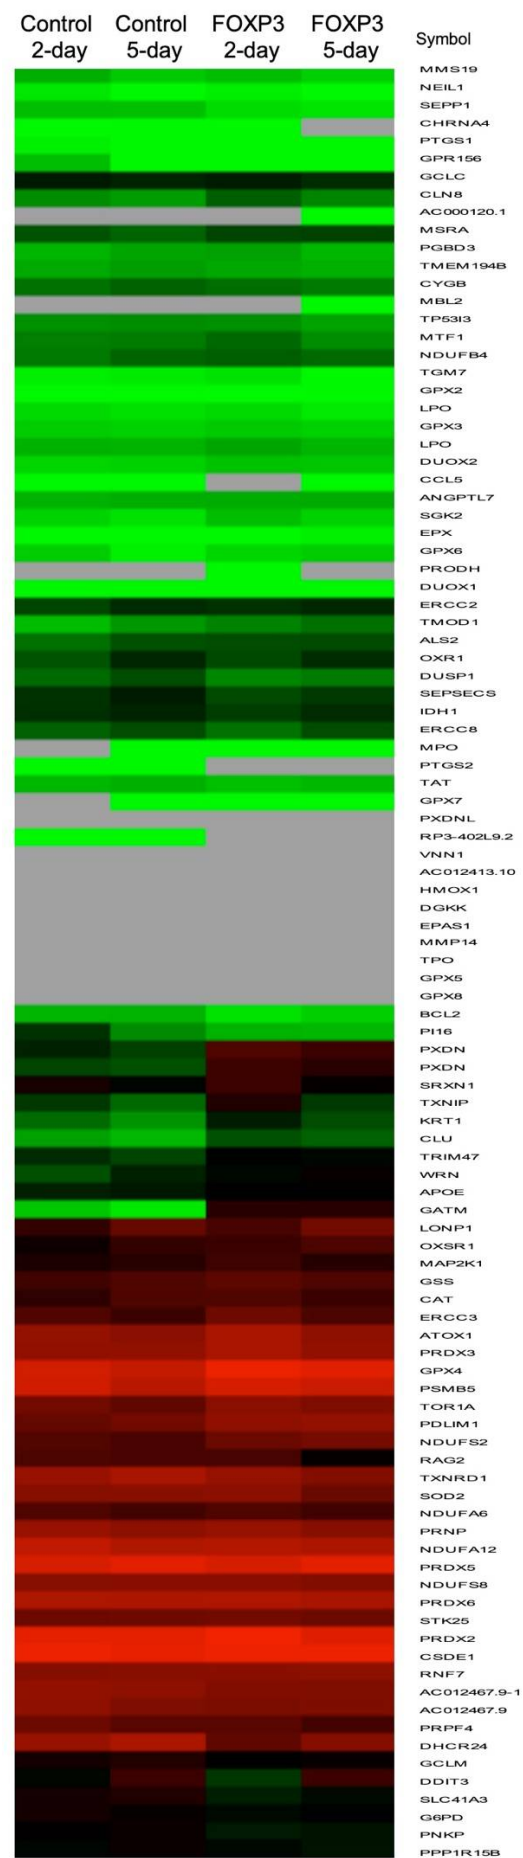

Supplement: s1 [file s1]
